# Supplementary material for: In Silico and In Vitro Analysis of Sulforaphane Anti-Candida Activity
Source: MDPI journal article supplement (doi:10.3390/antibiotics11121842), 2022-12-19
Supplement: s1 [file s1]

**Supplementary Table S1.** Minimum Inhibitory Concentration (MIC; µg/ml) and Minimum Fungicidal Concentration (MFC; µg/ml) values of sulforaphane (SFN) compared to fluconazole (FLZ) against non-*Candida albicans* strains and clinical isolates.

| Strain                                          | MIC (µg/mL) |     | MFC (µg/mL) |      |
|-------------------------------------------------|-------------|-----|-------------|------|
|                                                 | SFN         | FLZ | SFN         | FLZ  |
| <i>C. parapsilosis</i> ATCC 22019               | 30          | 4   | 30          | 32   |
| Oral 01 HIV <sup>+</sup> <i>C. parapsilosis</i> | 60          | 4   | 60          | 32   |
| <i>C. krusei</i> ATCC 6258                      | 7.5         | 16  | 7.5         | 16   |
| Oral 22 <i>C. krusei</i>                        | 30          | 16  | 30          | > 64 |
| <i>C. glabrata</i> ATCC 2001                    | 30          | 4   | 30          | > 64 |
| Vaginal 11 <i>C. glabrata</i>                   | 30          | 16  | 30          | 64   |
| Vaginal 14 <i>C. glabrata</i>                   | 1.87        | 16  | 1.87        | 32   |

**Supplementary Table S2.** *In silico* identification of additional non-antimicrobial activities of sulforaphane (SFN) and fluconazole (FLZ).

| SFN                                 |       |       | FLZ                          |       |       |
|-------------------------------------|-------|-------|------------------------------|-------|-------|
| Non-antimicrobial activities        | Pa    | Pi    | Non-antimicrobial activities | Pa    | Pi    |
| CYP2E1 inhibitor                    | 0.986 | 0.001 | Cytochrome P450 inhibitor    | 0.740 | 0.004 |
| Glutathione S-transferase substrate | 0.961 | 0.002 |                              |       |       |
| Apoptosis inducer                   | 0.950 | 0.003 |                              |       |       |
| Chemoprotective                     | 0.915 | 0.001 |                              |       |       |
| Cytoprotectant                      | 0.887 | 0.001 |                              |       |       |
| NF-E2-related factor 2 stimulant    | 0.882 | 0.000 |                              |       |       |
| HMOX1 expression enhancer           | 0.833 | 0.003 |                              |       |       |

Pa: probability of a compound being active; Pi: probability of a compound being inactive.
